# Supplementary material
Source: Copernicus journal article supplement (doi:10.5194/acp-26-9277-2026)
Supplement: Supplementary file [file acp-26-9277-2026-supplement-title-page.pdf › acp-26-9277-2026-supplement-title-page.pdf]

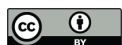

*Supplement of*

**Gas-phase degradation of the aroma compound ethyl butyrate and its methylated derivatives: UV-C photolysis and reactions with the hydroxyl radical**

**Finja Löher et al.**

*Correspondence to:* Finja Löher ([finja.loeber@york.ac.uk](mailto:finja.loeber@york.ac.uk)) and Terry J. Dillon ([terry.dillon@york.ac.uk](mailto:terry.dillon@york.ac.uk))

- [acp-26-9277-2026-supplement-title-page.pdf](#)
- [Supplementary\\_Information.pdf](#)
- [UVvis\\_spectra.txt](#)

The copyright of individual parts of the supplement might differ from the article licence.
